# Supplementary material for: Phase and composition controlled synthesis of cobalt sulfide hollow nanospheres for electrocatalytic water splitting
Source: Royal Society of Chemistry journal article supplement (doi:10.1039/c7nr09424h), 2018-01-01
Supplement: c7nr09424h1.pdf [file c7nr09424h1.pdf]

Electronic Supplementary Information

## **Phase and composition controlled synthesis of cobalt sulfides hollow nanospheres for electrocatalytic water splitting**

Xiaoya Ma, Wei Zhang, Yida Deng, Cheng Zhong, Wenbin Hu and Xiaopeng Han\*

Tianjin Key Laboratory of Composite and Functional Materials, Key Laboratory of Advanced Ceramics and Machining Technology (Ministry of Education), School of Materials Science and Engineering, Tianjin University, Tianjin 300072, China.

\*E-mail: [xphan@tju.edu.cn](mailto:xphan@tju.edu.cn)

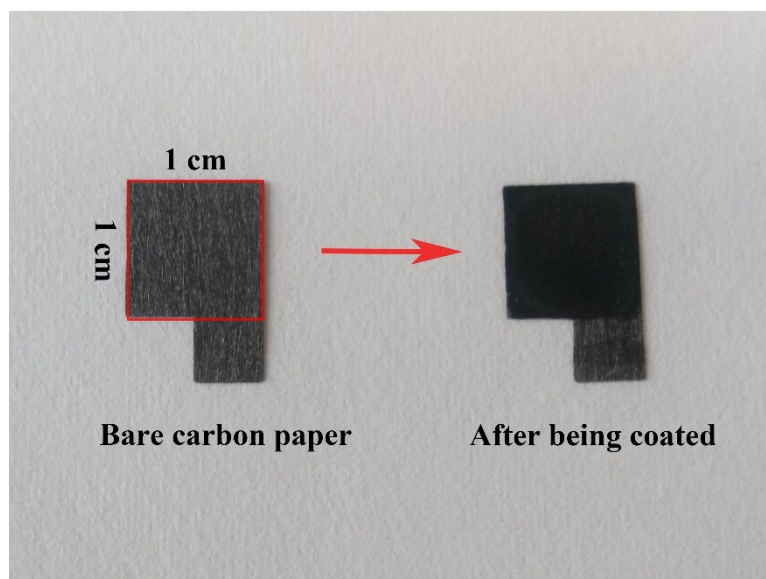

**Fig. S1** Digital images of carbon papers before and after coating the active material slurry.

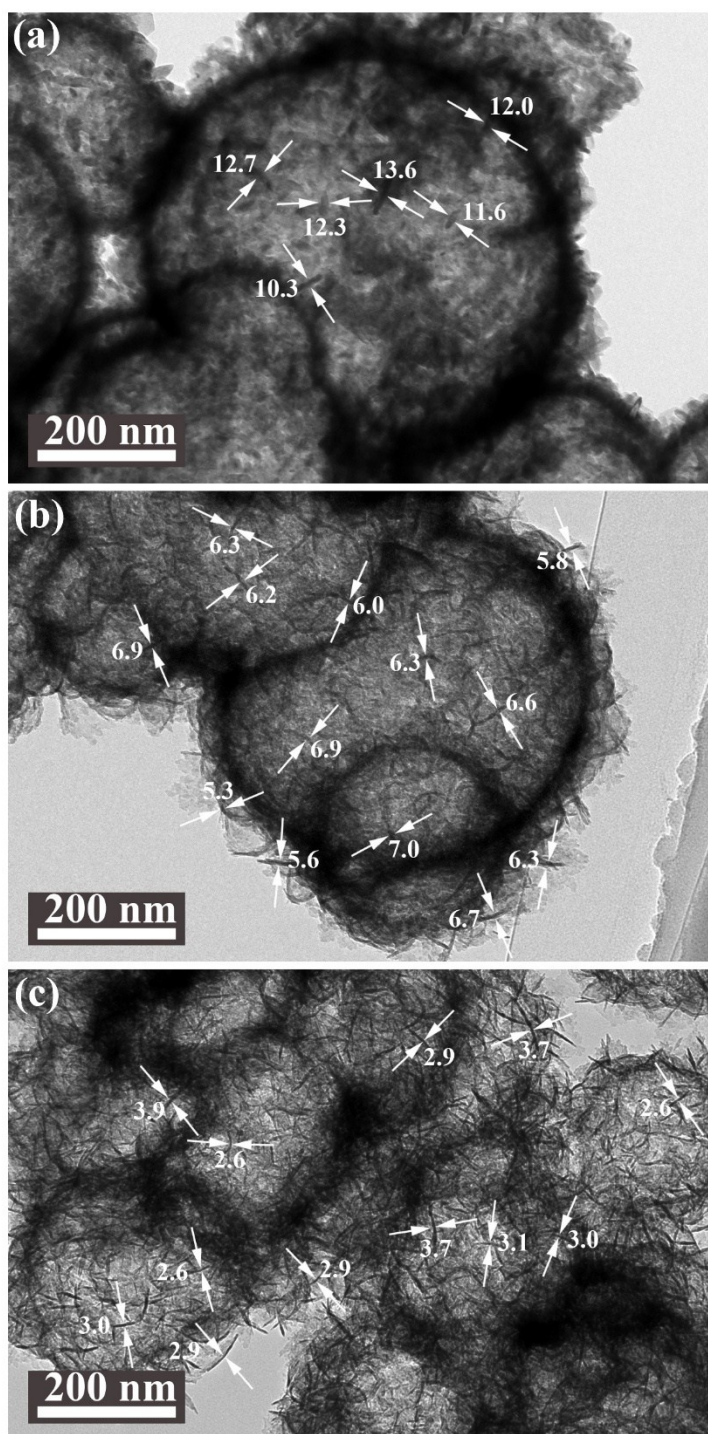

**Fig. S2** TEM images of (a)  $\text{Co}_9\text{S}_8$ , (b)  $\text{Co}_3\text{S}_4$  and (c)  $\text{CoS}_2$  HNSs. The results show that as the molar ratio of sulfur to cobalt source increases, the sphere structure becomes looser and the surface of nanosheets become thinner.

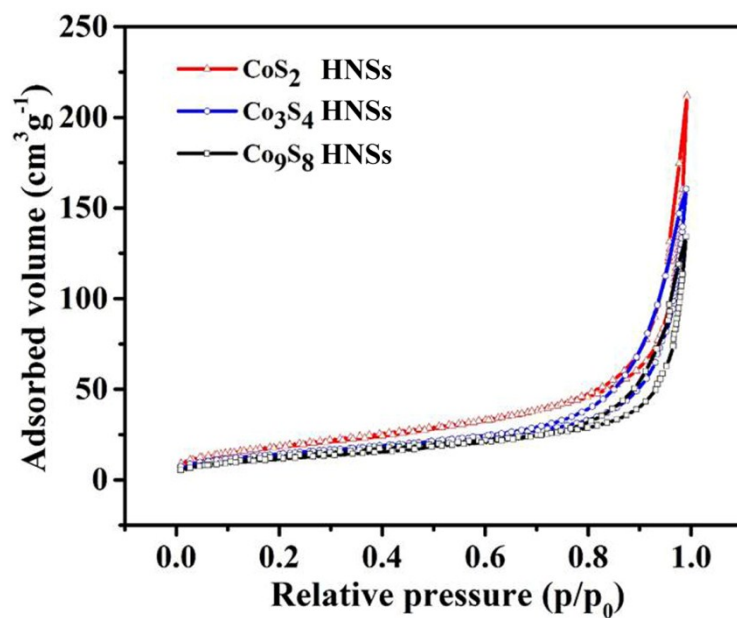

**Fig. S3** N<sub>2</sub> adsorption–desorption isotherms of Co<sub>9</sub>S<sub>8</sub>, Co<sub>3</sub>S<sub>4</sub> and CoS<sub>2</sub> HNSs.

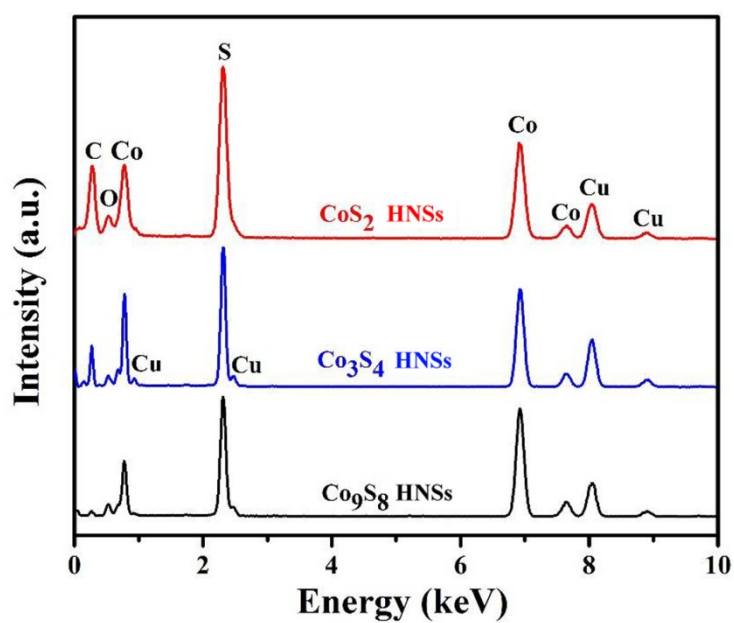

**Fig. S4** EDS spectra of Co<sub>9</sub>S<sub>8</sub>, Co<sub>3</sub>S<sub>4</sub> and CoS<sub>2</sub> HNSs.

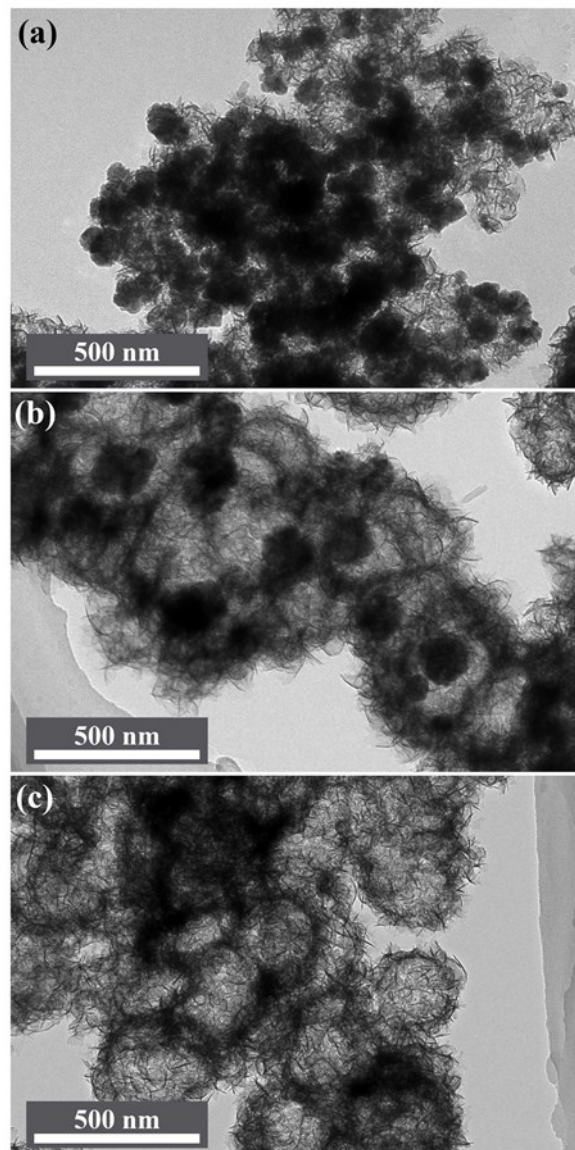

**Fig. S5** TEM images of  $\text{CoS}_2$  samples obtained at different reaction time: (a) 3 h, (b) 6 h, (c) 9 h.

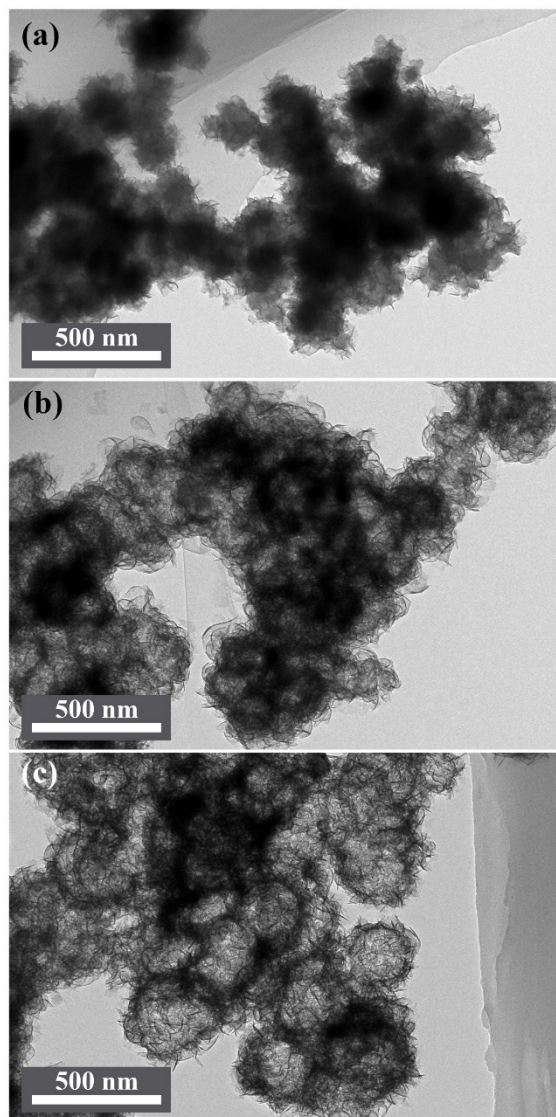

**Fig. S6** TEM images of CoS<sub>2</sub> samples obtained at different reaction temperature: (a) 120 °C, (b) 160 °C, (c) 200 °C.



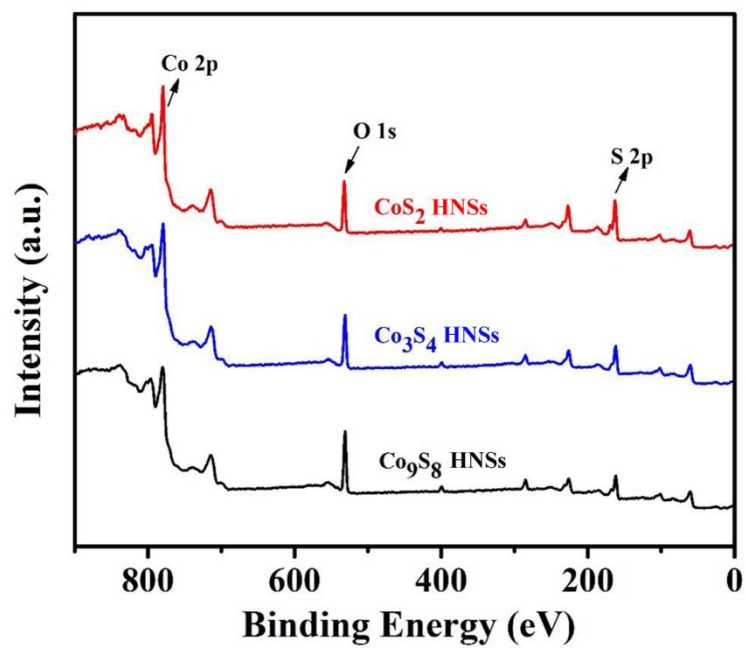

**Fig. S7** XPS survey spectra of Co<sub>9</sub>S<sub>8</sub>, Co<sub>3</sub>S<sub>4</sub> and CoS<sub>2</sub> HNSs.

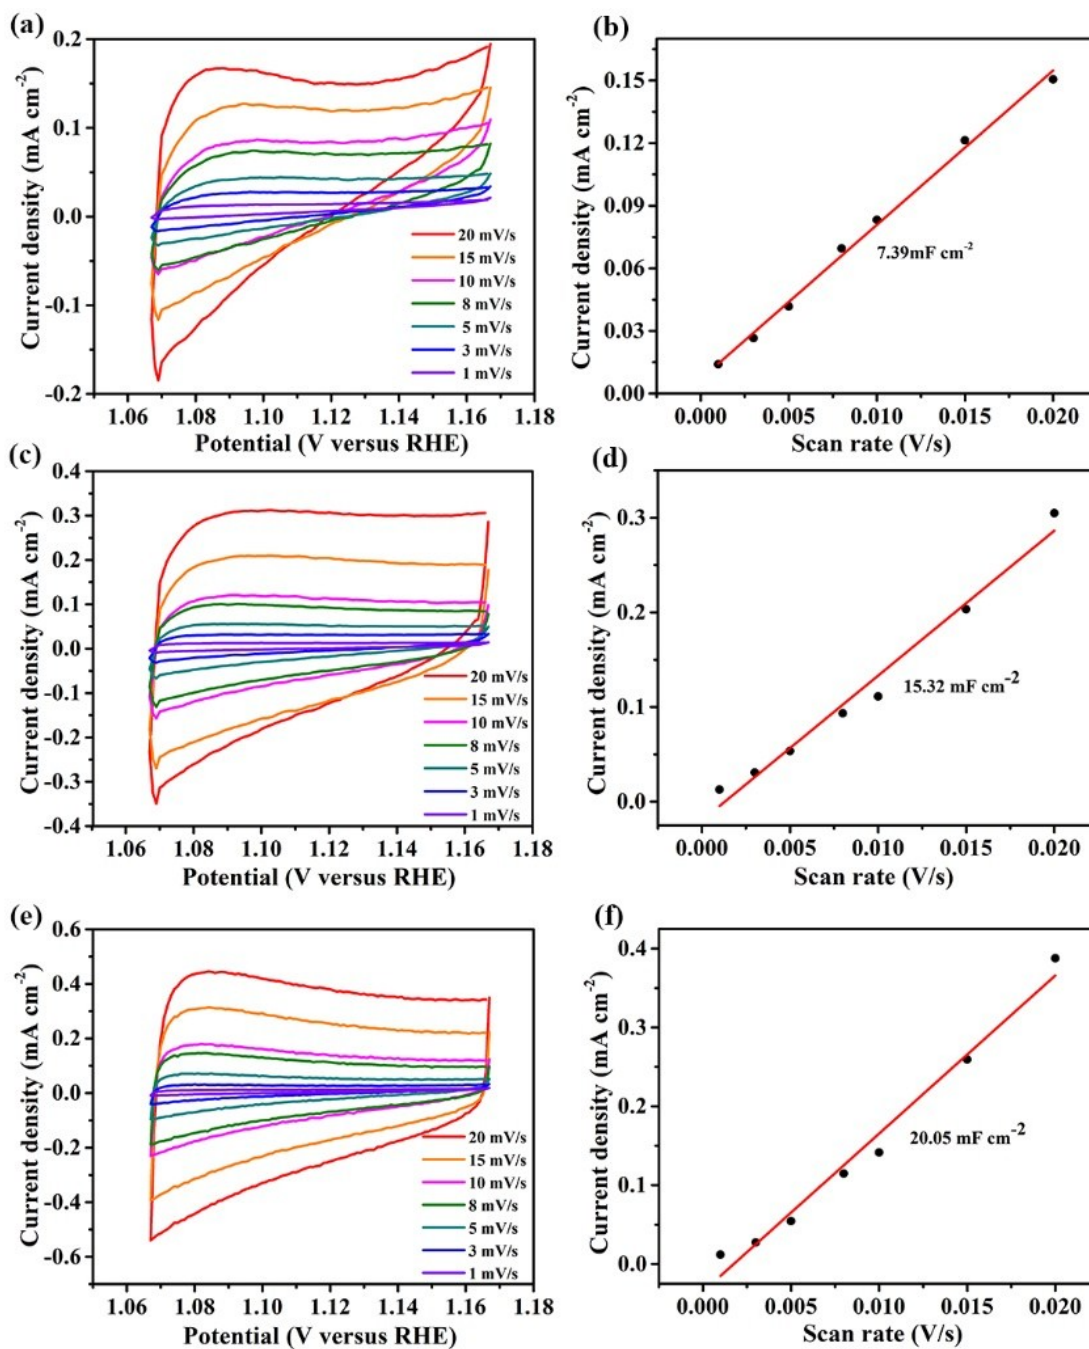

**Fig. S8** Cycle voltammograms from 1.067 to 1.167 V vs RHE in 1.0 M KOH at different scan rates and the corresponding linear fitting of the capacitive density versus scan rates of (a, b)  $\text{Co}_9\text{S}_8$ , (c, d)  $\text{Co}_3\text{S}_4$ , and (e, f)  $\text{CoS}_2$  HNSs.



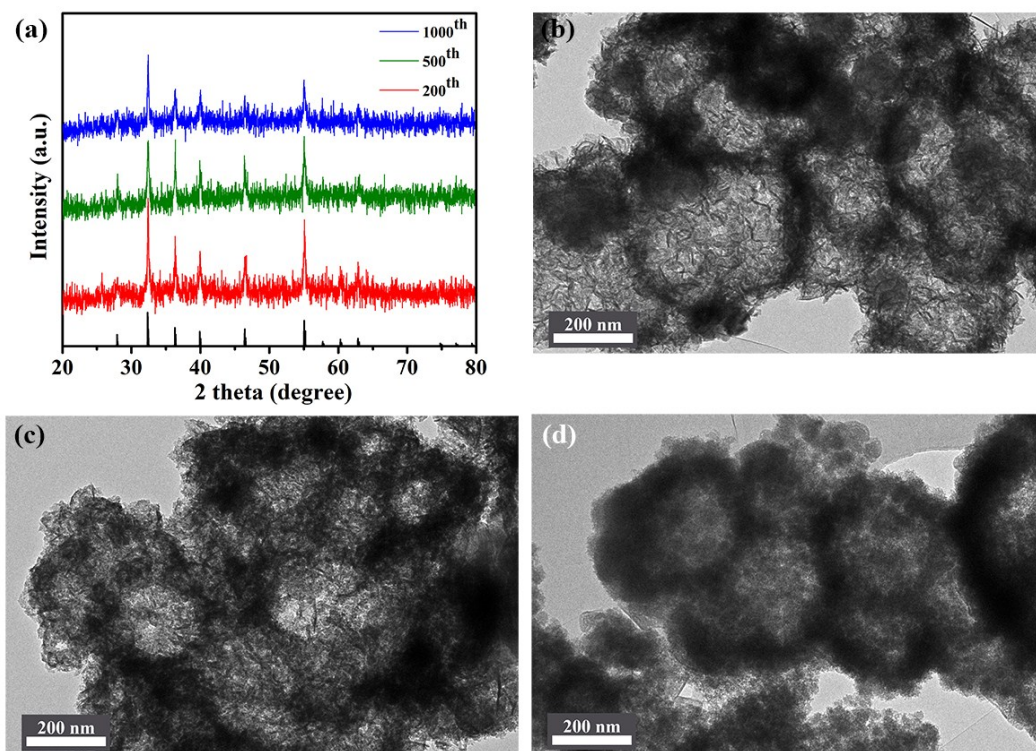

**Fig. S9** (a) XRD patterns and (b-d) TEM image of CoS<sub>2</sub> HNSs after 200 (b), 500 (c), and 1000 (d) OER cycles.

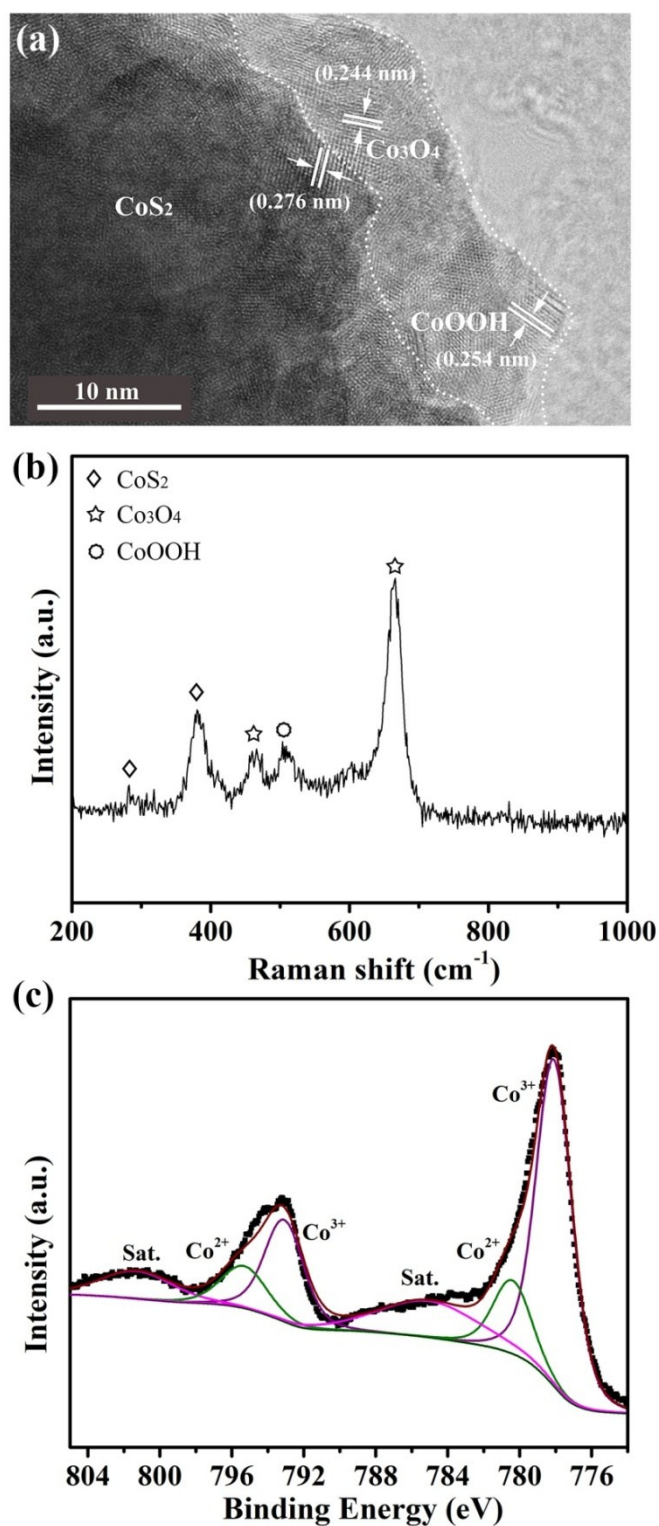

**Fig. S10** (a) HRTEM, (b) Raman and (c) Co 2p XPS spectrum of CoS<sub>2</sub> HNSs after 1000 OER cycles. HRTEM and Raman results reveal the formation of Co<sub>3</sub>O<sub>4</sub>/CoOOH after 1000 OER cycles. In XPS spectrum, the ratio of Co<sup>3+</sup> to Co<sup>2+</sup> is much higher than original CoS<sub>2</sub> (Fig. 4a), which confirms the formation of higher valence state of Co after OER cycles.

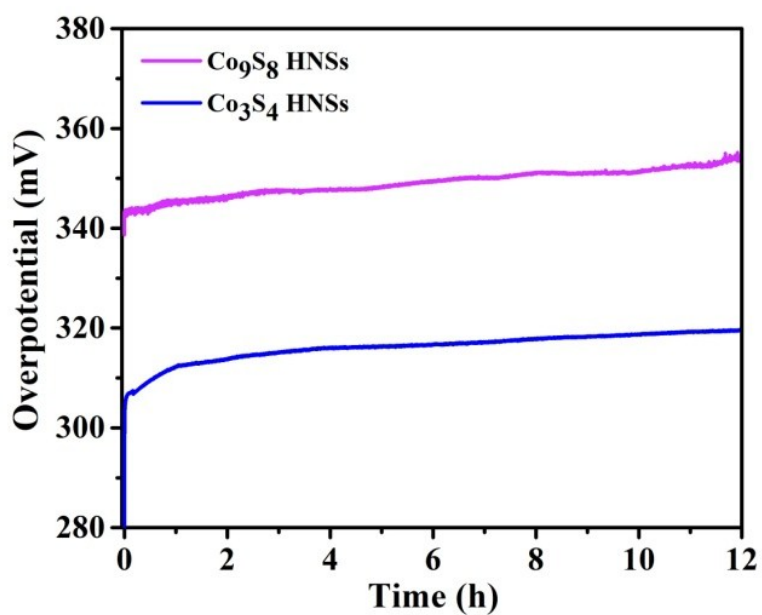

**Fig. S11** Chronopotentiometric response of  $\text{Co}_3\text{S}_4$  and  $\text{Co}_9\text{S}_8$  HNSs at a constant OER current density of  $10 \text{ mA cm}^{-2}$ .

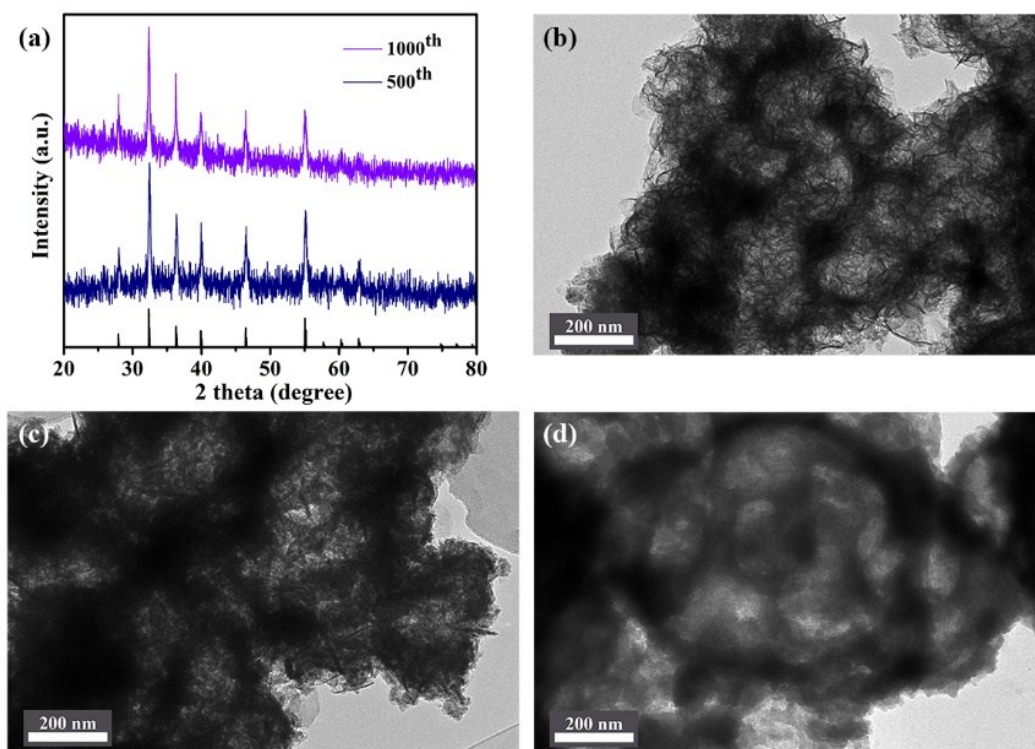

**Fig. S12** (a) XRD patterns and (b-d) TEM image of  $\text{CoS}_2$  HNSs after 200 (b), 500 (c), and 1000 (d) HER cycles.

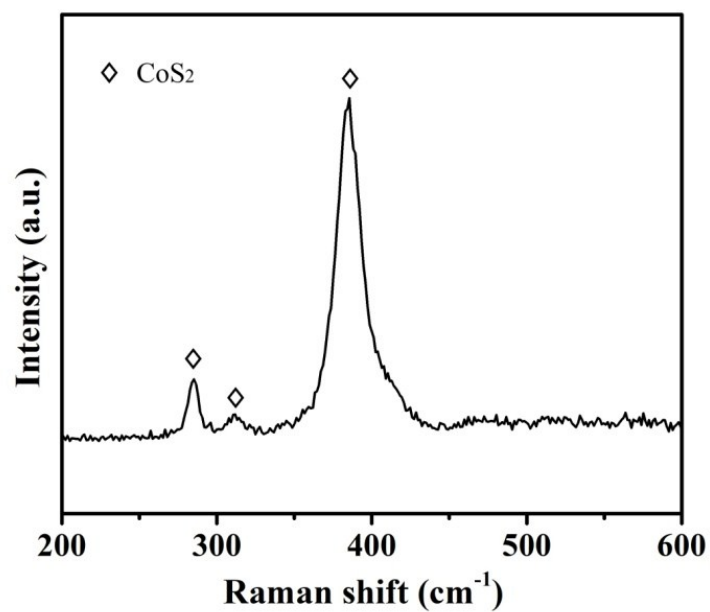

**Fig. S13** Raman spectrum of CoS<sub>2</sub> HNSs after 1000 HER cycles.

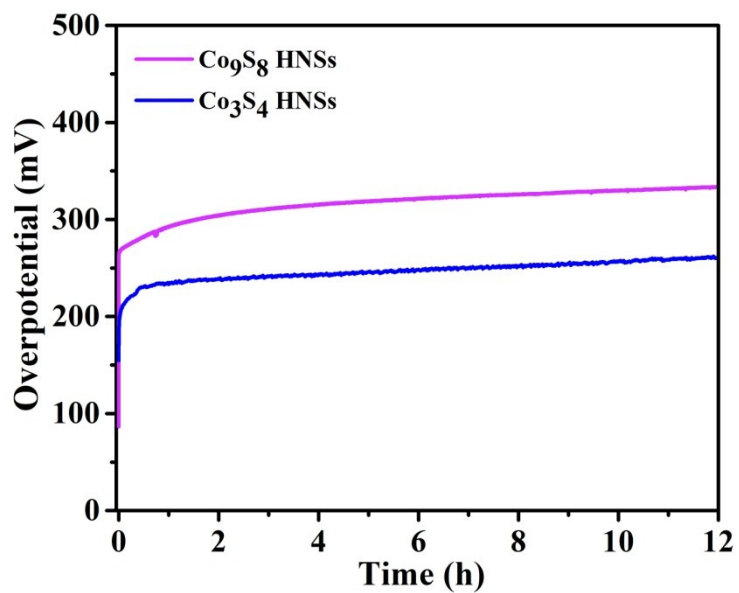

**Fig. S14** Chronopotentiometric response of Co<sub>3</sub>S<sub>4</sub> and Co<sub>9</sub>S<sub>8</sub> HNSs at a constant HER current density of 10 mA cm<sup>-2</sup>.

**Table S1.** Co and S atomic percentage in  $\text{Co}_9\text{S}_8$ ,  $\text{Co}_3\text{S}_4$ , and  $\text{CoS}_2$  HNSs from EDS spectra.

| Catalysts                    | Percentage of Co (%) | Percentage of S (%) |
|------------------------------|----------------------|---------------------|
| $\text{CoS}_2$ HNSs          | 32.60                | 67.40               |
| $\text{Co}_3\text{S}_4$ HNSs | 42.75                | 57.25               |
| $\text{Co}_9\text{S}_8$ HNSs | 48.58                | 51.42               |

**Table S2.** Comparison of OER performances of CoS<sub>2</sub> HNSs with other reported similar non-noble metal OER electrocatalysts.

| Catalyst                                                  | Electrode               | Electrolyte | Loading density (mg cm <sup>-2</sup> ) | Current density (mA cm <sup>-2</sup> ) | Overpotential (mV) | Refs |
|-----------------------------------------------------------|-------------------------|-------------|----------------------------------------|----------------------------------------|--------------------|------|
| Co <sub>9</sub> S <sub>8</sub> hollow microplates         | glassy carbon electrode | 1.0M KOH    | 0.37                                   | 10                                     | 278                | 1    |
| FeB <sub>2</sub>                                          | glassy carbon electrode | 1.0M KOH    | 0.2                                    | 10                                     | 296                | 2    |
| Co-P film                                                 | copper foil             | 1.0M KOH    | 2.71                                   | 10                                     | 345                | 3    |
| Ni <sub>3</sub> S <sub>2</sub> /Ni                        | Ni foam                 | 0.1M KOH    | 37.00                                  | 10                                     | 187                | 4    |
| Ni <sub>x</sub> Co <sub>3-x</sub> O <sub>4</sub> nanowire | Ti foil                 | 1.0M KOH    | 3.00                                   | 10                                     | 370                | 5    |
| NiFe-LDH/rGO                                              | Ni foam                 | 1.0M KOH    | 0.5                                    | 10                                     | 250                | 6    |
| NiCo <sub>2</sub> S <sub>4</sub> @N/S-rGO                 | glassy carbon electrode | 0.1 M KOH   | 0.283                                  | 10                                     | 470                | 7    |
| NiCo hydroxide nanosheets                                 | MOFs                    | 1.0M KOH    | 0.17                                   | 10                                     | 324                | 8    |
| Mn-Co oxyphosphide                                        | glassy carbon electrode | 1.0 M KOH   | 0.25                                   | 10                                     | 370                | 9    |
| NiP nanoparticle film                                     | copper foam             | 1.0 M KOH   | 5                                      | 10                                     | 325                | 10   |
| CoS <sub>2</sub> HNSs                                     | Carbon                  | 1.0M KOH    | 1.5                                    | 10                                     | 290                | This |
|                                                           | paper                   |             |                                        | 20                                     | 305                | work |



**Table S3.** Comparison of the HER Performances of CoS<sub>2</sub> HNSs with other reported similar non-noble metal HER electrocatalysts.

| Catalyst                          | Electrode               | Electrolyte | Loading density<br>(mg cm <sup>-2</sup> ) | Current density<br>(mA cm <sup>-2</sup> ) | Overpotential<br>(mV) | Refs |
|-----------------------------------|-------------------------|-------------|-------------------------------------------|-------------------------------------------|-----------------------|------|
| CoO <sub>x</sub> @CN              | glassy carbon electrode | 1.0M KOH    | 0.54                                      | 10                                        | 232                   | 11   |
| Ni/MWCNT                          | stainless steel meshes  | 1.0M KOH    | ----                                      | 10                                        | 350                   | 12   |
| Co-Ni-B@NF                        | Ni foam                 | 1.0M KOH    | ----                                      | 10                                        | 205                   | 13   |
| Ni/Mo <sub>2</sub> C-PC           | glassy carbon electrode | 1.0M KOH    | 0.5                                       | 10                                        | 179                   | 14   |
| Co-NRCNTs                         | glassy carbon electrode | 1.0M KOH    | 0.28                                      | 10                                        | 370                   | 15   |
| Zn-Co-S nanoneedles               | Carbon fiber paper      | 1.0M KOH    | 0.6                                       | 10                                        | 234                   | 16   |
| MoB                               | carbon paste electrode  | 1.0M KOH    | 2.30                                      | 10                                        | 210                   | 17   |
| MoS <sub>2</sub> -WS <sub>2</sub> | Ni foam                 | 1.0M KOH    | ----                                      | 10                                        | 275                   | 18   |
| FeP NAs                           | Carbon cloth            | 1.0M KOH    | 1.5                                       | 20                                        | 370                   | 19   |
| CoS <sub>2</sub> HNSs             | Carbon paper            | 1.0 M KOH   | 1.5                                       | 10                                        | 193                   | This |
|                                   |                         |             |                                           | 20                                        | 223                   | work |

**Table S4.** Comparison of two-electrode water-splitting voltage of CoS<sub>2</sub> HNSs/CP catalyst with other reported bifunctional electrocatalysts.

| Catalyst                                      | Electrolyte | Current density<br>(mA cm <sup>-2</sup> ) | Overall voltage<br>(V) | References |
|-----------------------------------------------|-------------|-------------------------------------------|------------------------|------------|
| NiCo <sub>2</sub> S <sub>4</sub> @NiFe LDH/NF | 1.0M KOH    | 10                                        | 1.6                    | 20         |
| CoFe LDH-F                                    | 1.0M KOH    | 10                                        | 1.63                   | 21         |
| EG/Co <sub>0.85</sub> Se/NiFe-LDH             | 1.0M KOH    | 10                                        | 1.67                   | 22         |
| NiFe/NiCo <sub>2</sub> S <sub>4</sub> /NF     | 1.0M KOH    | 10                                        | 1.67                   | 23         |
| CoP <sub>x</sub> /NC                          | 1.0M KOH    | 10                                        | 1.71                   | 24         |
| Ni/Mo <sub>2</sub> C-PC                       | 1.0M KOH    | 10                                        | 1.66                   | 14         |
| Zn-Co-S NN/CFP                                | 1.0M KOH    | 10                                        | 1.72                   | 16         |
| Ni <sub>5</sub> P <sub>4</sub> /NF            | 1.0M KOH    | 10                                        | 1.69                   | 25         |
| Ni <sub>3</sub> S <sub>2</sub> /NF            | 1.0M KOH    | 13                                        | 1.76                   | 26         |
| CoS <sub>2</sub> HNSs/CP                      | 1.0 M KOH   | 10                                        | 1.68                   | This work  |

## References

- S1. H. Liu, F. X. Ma, C. Y. Xu, L. Yang, Y. Du, P. P. Wang, S. Yang and L. Zhen, *ACS Appl. Mater. Interfaces*, 2017, **9**, 11634-11641.
- S2. H. Li, P. Wen, Q. Li, C. Dun, J. Xing, C. Lu, S. Adhikari, L. Jiang, D. L. Carroll and S. M. Geyer, *Adv. Energy Mater.*, 2017, **7**, 1700513.
- S3. N. Jiang, B. You, M. Sheng and Y. Sun, *Angew. Chem. Int. Ed.*, 2015, **54**, 6251-6254.
- S4. W. Zhou, X. J. Wu, X. Cao, X. Huang, C. Tan, J. Tian, H. Liu, J. Wang and H. Zhang, *Energy Environ. Sci.*, 2013, **6**, 2921-2924.
- S5. Y. Li, P. Hasin and Y. Wu, *Adv. Mater.*, 2010, **22**, 1926-1929.
- S6. T. Zhan, Y. Zhang, X. Liu, S. Lu and W. Hou, *J. Power Sources*, 2016, **333**, 53-60.
- S7. Q. Liu, J. Jin and J. Zhang, *ACS Appl. Mater. Interfaces*, 2013, **5**, 5002-5008.
- S8. H. Liang, F. Meng, M. Caban-Acevedo, L. Li, A. Forticaux, L. Xiu, Z. Wang and S. Jin, *Nano Lett.*, 2015, **15**, 1421-1427.
- S9. B. Y. Guan, L. Yu and X. W. Lou, *Angew. Chem. Int. Ed.*, 2017, **56**, 2386-2389.
- S10. Q. Liu, S. Gu and C. M. Li, *J. Power Sources*, 2015, **299**, 342-346.
- S11. H. Y. Jin, J. Wang, D. F. Su, Z. Z. Wei, Z. F. Pang and Y. Wang, *J. Am. Chem. Soc.*, 2015, **137**, 2688-2694.
- S12. M. A. McArthur, L. Jorge, S. Coulombe and S. Omanovic, *J. Power Sources*, 2014, **266**, 365-373.
- S13. N. Xu, G. Cao, Z. Chen, Q. Kang, H. Dai and P. Wang, *J. Mater. Chem. A*, 2017, **5**, 12379-12384.
- S14. Z. Y. Yu, Y. Duan, M. R. Gao, C. C. Lang, Y. R. Zheng and S. H. Yu, *Chem. Sci.*, 2017, **8**, 968-973.
- S15. X. Zou, X. Huang, A. Goswami, R. Silva, B. R. Sathe, E. Mikmekova and T. Asefa, *Angew. Chem. Int. Ed.*, 2014, **53**, 4372-4376.
- S16. X. Wu, X. Han, X. Ma, W. Zhang, Y. Deng, C. Zhong and W. Hu, *ACS Appl. Mater. Interfaces*, 2017, **9**, 12574-12583.
- S17. H. Vrubel and X. Hu, *Angew. Chem. Int. Ed.*, 2012, **51**, 12703-12706.

- S18. S. K. Kim, W. Song, S. Ji, Y. R. Lim, Y. B. Lee, S. Myung, J. Lim, K.-S. An and S. S. Lee, *Appl. Surf. Sci.*, 2017, **425**, 241-245.
- S19. Y. Liang, Q. Liu, A. M. Asiri, X. Sun and Y. Luo, *ACS Catal.*, 2014, **4**, 4065-4069.
- S20. J. Liu, J. Wang, B. Zhang, Y. Ruan, L. Lv, X. Ji, K. Xu, L. Miao and J. Jiang, *ACS Appl. Mater. Interfaces*, 2017, **9**, 15364-15372.
- S21. P. F. Liu, S. Yang, B. Zhang and H. G. Yang, *ACS Appl. Mater. Interfaces*, 2016, **8**, 34474-34481.
- S22. Y. Hou, M. R. Lohe, J. Zhang, S. Liu, X. Zhuang and X. Feng, *Energy Environ. Sci.*, 2016, **9**, 478-483.
- S23. C. Xiao, Y. Li, X. Lu and C. Zhao, *Adv. Funct. Mater.*, 2016, **26**, 3515-3523.
- S24. B. You, N. Jiang, M. Sheng, S. Gul, J. Yano and Y. Sun, *Chem. Mater.*, 2015, **27**, 7636-7642.
- S25. M. Ledendecker, S. Krick Calderon, C. Papp, H. P. Steinruck, M. Antonietti and M. Shalom, *Angew. Chem. Int. Ed.*, 2015, **54**, 12361-12365.
- S26. L. L. Feng, G. Yu, Y. Wu, G. D. Li, H. Li, Y. Sun, T. Asefa, W. Chen and X. Zou, *J. Am. Chem. Soc.*, 2015, **137**, 14023-14026.
